# Supplementary material for: GWAS of multiple neuropathology endophenotypes identifies new risk loci and provides insights into the genetic risk of dementia
Source: PubMed Central journal article supplement — Nat Genet. 2024 Oct 8;56(11):2407–21. doi: 10.1038/s41588-024-01939-9 (PMC11549054; doi:10.1038/s41588-024-01939-9), 2024-10-08
Supplement: 41588_2024_1939_MOESM1_ESM.pdf [file 41588_2024_1939_MOESM1_ESM.pdf]

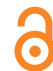

# **GWAS of multiple neuropathology endophenotypes identifies new risk loci and provides insights into the genetic risk of dementia**

---

In the format provided by the authors and unedited

## Table of Contents

### Table of Contents

|                                                                                                |           |
|------------------------------------------------------------------------------------------------|-----------|
| <b><i>Table of Contents</i></b> .....                                                          | <b>1</b>  |
| <b><i>Supplementary Methods</i></b> .....                                                      | <b>2</b>  |
| Quality control .....                                                                          | 2         |
| NACC Exclusion Criteria .....                                                                  | 2         |
| Harmonization of NPE .....                                                                     | 2         |
| Sensitivity analyses for <i>APOC2</i> locus association with CAA .....                         | 4         |
| Software .....                                                                                 | 4         |
| <b><i>Supplementary Results</i></b> .....                                                      | <b>5</b>  |
| Polychoric Correlations of Neuropathology Endophenotypes .....                                 | 5         |
| Suggestive Loci Identified in NPE GWAS .....                                                   | 5         |
| rs7247551 shows consistent association with CAA across <i>APOE</i> $\epsilon$ diplotypes ..... | 6         |
| <b><i>Consortium Authors and Affiliations</i></b> .....                                        | <b>7</b>  |
| Nationals Alzheimer's Coordinating Center Investigators .....                                  | 7         |
| Nationals Alzheimer's Coordinating Center Investigator Affiliations .....                      | 7         |
| Alzheimer's Disease Genetics Consortium Investigators .....                                    | 7         |
| Alzheimer's Disease Genetics Consortium Investigator Affiliations .....                        | 8         |
| <b><i>Alzheimer's Disease Genetics Consortium Full Acknowledgments</i></b> .....               | <b>10</b> |
| <b><i>Supplement References</i></b> .....                                                      | <b>11</b> |

## Supplementary Methods

### Quality control

Quality control on genotype data was performed separately for each data source. Quality control and inclusion/exclusion criteria closely followed that used in our previous brain arteriolosclerosis genome-wide association study (GWAS)<sup>1</sup>. After imputation, we first identified and subsequently removed duplicate samples using the KING software “--duplicate” option<sup>2</sup>. We then removed participants without autopsy data available by merging genotype sample identification data with neuropathology data sets and retaining only samples present in both data sets. We then iteratively removed genetic variants and participants until no variants were missing in more than 5% of participants and no participants were missing more than 5% of variants (however, average genotype coverage was 99.7%, and no variants or participants were actually removed during this process). We then excluded participants with unusually high or low ( $\pm 3$  standard deviations from mean) genetic heterogeneity, as measured by the PLINK 1.9 “--het” flag (<https://www.cog-genomics.org/plink/1.9/>). Finally, we merged participants with the 1000 Genomes Phase 3 (1000 Genomes) cohorts<sup>3</sup> and performed principal components analysis (PCA) on a subset of independent variants (measured by pairwise  $r^2 < 0.2$ ). We excluded participants with substantial non-European ancestry, as determined by distance from the 1000 Genomes EUR superpopulation centroid using the first two principal components (PCs).

### NACC Exclusion Criteria

National Alzheimer’s Coordinating Center (NACC) participants were excluded if they had any of the conditions in the NACC Neuropathology Data Set shown in **Supplementary Table 6**. Variable names and descriptions are taken from <https://files.alz.washington.edu/documentation/rdd-np.pdf>. Variable descriptions may be lightly edited. Participants were not excluding for missing data in any fields.

### Harmonization of NPE

We harmonized 11 neuropathology endophenotypes (NPE) across the three data sources used: NACC, Religious Orders Study (ROS) and the Memory and Aging Project (MAP; together, ROSMAP), and Adult Changes in Thought (ACT). Arteriolosclerosis, Braak neurofibrillary tangle (NFT) stage, cerebral amyloid angiopathy (CAA), atherosclerosis, Consortium to Establish a Registry for Alzheimer’s Disease (CERAD) score for neuritic plaques, microinfarcts, and gross infarcts had variables in each cohort with directly comparable coding definitions and were straightforwardly harmonized with minimal recoding. Arteriolosclerosis, CAA, atherosclerosis, and CERAD score variables each had four stages with the following labels: 0 (“none”), 1 (“mild”), 2 (“moderate”), and 3 (“severe”). Microinfarcts and gross infarcts were labeled either 0 (“absent”) or 1 (“present”). Braak NFT Stage followed the staging criteria previously described in the literature and had seven levels, ranging from 0 (absent NFT) to six (diffuse NFT throughout cortex and large loss of neurons)<sup>4</sup>.

Limbic-predominant age-related transactive response DNA-binding protein 43 (TDP-43) encephalopathy (LATE) neuropathologic change (LATE-NC) was recorded differently in several of the data sets and was harmonized to a four-level outcome variable following the simplified staging of TDP-43 pathology outlined in Figure 3B of the 2019 LATE working group report<sup>5</sup>. The following levels were used in the analyzed LATE-NC variable: 0, indicating lack of recorded TDP-43 proteinopathy; 1, indicating TDP-43 deposits in the amygdala only; 2, indicating deposits in the hippocampus or entorhinal cortex; and 3, indicating deposits in the neocortex. In ROSMAP, TDP-43 pathology is recorded as a single variable following the same staging detailed above. In NACC, the presence of TDP-43 pathology in each region of the brain is recorded as a separate binary indicator variable. To collapse TDP-43 pathology to a single ordinal variable, we assigned a value based on the presence of the “highest” region where TDP-43 was present (*e.g.* a participant with TDP-43 pathology in both the hippocampus and the neocortex would be assigned a value of 3). Participants were labeled as 0 if they met two conditions: (1) they had recorded TDP-43 data available for at least one of the brain regions used for staging and (2) TDP-43 pathology was noted as absent in all the regions for which they had data available.

Diffuse amyloid plaque pathology was recorded as a four-stage Thal phase of amyloid deposition in NACC, ACT, and ADNI with the following levels: 0 (“none”), 1 (“mild”), 2 (“moderate”), and 3 (“severe”). In ROSMAP, diffuse plaques were examined and quantified in five regions (midfrontal cortex, entorhinal cortex, inferior parietal cortex, and hippocampus), then scaled by each region’s standard deviation and averaged. To discretize this continuous variable in ROSMAP participants to a four-level variable, as recorded in the other data sets, we assigned participants a value of 0 (“none”) if their averaged score was equal to 0 (18.8%), 1 (“mild”) if their score was higher than 0 but  $\leq 0.5$  (29.7%), 2 (“moderate”) if their score was between 0.5 and one (23.5%), and 3 (“severe”) if their score was above 1 (26.8%). These labels roughly corresponded to score quartiles in ROSMAP (**Table 1** in main text).

Hippocampal sclerosis is recorded as a binary indicator of the presence or absence of pathology in the NACC Neuropathology data set form version 1-9, ROSMAP, and ACT. In versions 10 and 11 of the NACC Neuropathology form, hippocampal sclerosis pathology is recorded as being absent, unilateral, or bilateral. To harmonize, we dichotomized hippocampal sclerosis pathology as being present if either unilateral or bilateral pathology was indicated.

The Lewy body pathology variable we analyzed had four levels: 0, indicating absent Lewy body pathology in all regions examined or limited to the olfactory bulb; 1, indicating Lewy body pathology limited to the brainstem, including the substantia nigra; 2, indicating Lewy body pathology involving the limbic system or amygdala; and 3, indicating Lewy body involvement in the neocortex. In NACC and ROSMAP, Lewy body pathology was graded in ordinal variables with levels corresponding to the levels in the final harmonized outcome variable analyzed. In ACT, separate binary indicator variables were used to indicate presence of Lewy body pathology in each brain region checked. To harmonize, we created a new variable that coded Lewy body pathology stage according to the “highest” stage present in an individual (*e.g.* if pathology was present in both the amygdala and the neocortex, we assigned a value of 3).

## Sensitivity analyses for *APOC2* locus association with CAA

We performed several sensitivity analyses to further investigate the novel CAA-associated locus on Chromosome 19 near *APOC2* identified when adjusting for *APOE*  $\epsilon$  diplotype with individual cohorts (NACC  $n = 5,927$ , ROSMAP  $n = 1,172$ , ACT  $n = 677$ ) and meta-analysis ( $n = 7,776$ ) using METAL. First, for each of the NACC, ROSMAP, and ACT data sources, we re-analyzed the association between CAA and lead variant rs7247551 from the meta-analysis while stratifying by *APOE*  $\epsilon$  diplotype and visually compared effect sizes across groups. Due to low sample sizes preventing model convergence, *APOE*  $\epsilon 4$  carriers (diplotypes  $\epsilon 3/\epsilon 4$ ,  $\epsilon 4/\epsilon 4$ ,  $\epsilon 3/\epsilon 4$ ) were merged in analyses for ROSMAP and ACT. Then, for each data source, we performed an association analysis between CAA and rs7247551 that included interaction effects between rs7247551 and *APOE*  $\epsilon$  diplotype. We then performed ANOVA between these models and nested models which did not include interaction effects and performed Chi-Square tests to test whether any interaction terms were significant. We used  $P < 0.05$  for the significance threshold.

## Software

The following software was used in the current study. Links to websites containing downloads for software are provided.

bcftools 1.10.2 <https://samtools.github.io/bcftools/>  
KING 2.2.7 <https://www.kingrelatedness.com/Download.shtml>  
MAGMA 1.10 <https://cncr.nl/research/magma/>  
METAL 2011-03-25 <https://csg.sph.umich.edu/abecasis/Metal/download/>  
Minimac 4 <https://github.com/statgen/Minimac4>  
PLINK 1.9 and 2.0 <https://www.cog-genomics.org/plink/>  
Python 3.8.16 and 3.10.8 <https://www.python.org/downloads/>  
R 4.2.1 and 4.2.2 <https://cran.r-project.org/>  
R package coloc 5.2.2 <https://github.com/chr1swallace/coloc>  
R package data.table 1.14.10 <https://cran.r-project.org/>  
R package GENESIS 2.26.0 <https://bioconductor.org/packages/3.18/bioc/>  
R package ggplot2 3.4.2 <https://cran.r-project.org/>  
R package GRAB 0.1.1 <https://wenjianbi.github.io/grab.github.io/>  
R package GWASTools 1.42.1 <https://bioconductor.org/packages/3.18/bioc/>  
R package LDlinkR 1.2.3 <https://bioconductor.org/packages/3.18/bioc/>  
R package ordinal 2023.12-04 <https://cran.r-project.org/>  
R package pheatmap 1.012 <https://cran.r-project.org/>  
R package POLMM 0.2.3 <https://github.com/WenjianBI/POLMM>  
R package SAIGE 1.1.3 <https://saigegit.github.io/SAIGE-doc/>  
R package SNPRelate 1.30.1 <https://bioconductor.org/packages/3.18/bioc/>  
R package stringi 1.8.3 <https://cran.r-project.org/>  
R package polycor 0.8-1 <https://cran.r-project.org/package=polycor>  
R package psych 2.3.3 <https://cran.r-project.org/package=psych>  
samtools 1.10 <https://github.com/samtools/samtools>  
TOPMed Imputation Server 1.7.3 <https://imputation.biodatacatalyst.nhlbi.nih.gov/#!>

## Supplementary Results

### Polychoric Correlations of Neuropathology Endophenotypes

We identified three positively correlated clusters of endophenotypes: a “vascular” cluster consisting of gross infarcts, microinfarcts, arteriolosclerosis, and atherosclerosis; an “Alzheimer’s disease” cluster consisting of Braak NFT stage, neuritic plaques, amyloid-beta plaques, and CAA; and a “LATE” cluster consisting of LATE-NC and hippocampal sclerosis (**Extended data Figure 1**). These results demonstrate that, as expected, many NPEs are not independent, though our GWAS results also suggest the genetic underpinnings are not identical.

### Suggestive Loci Identified in NPE GWAS

Here, we report suggestive hits from the NPE GWAS meta-analysis that met at least one of two criteria (**Figure 2**): (1) a suggestive threshold of  $P < 5 \times 10^{-7}$ , or (2) were previously reported by other studies (e.g., Bellenguez et al.<sup>6</sup>) as a disease-associated locus and met a threshold of  $P < 1 \times 10^{-5}$ . See **Supplementary Table 7** for gene list reported by other studies, beyond Bellenguez et al.

For previously reported loci meeting the threshold of  $P < 1 \times 10^{-5}$ , we observed twelve potential associations (**Figure 2** in main text purple; **Supplementary Table 8**). Nine of the twelve were reported in Bellenguez et al., including: (1) *CASS4* and amyloid- $\beta$  plaques (single-nucleotide polymorphism (SNP) located at chr20:56451506; odds ratio (OR) = 0.82;  $P = 1.8 \times 10^{-6}$ ; **Figure 2a**); (2) *EED* (from the broader *PICALM* locus) and CERAD (rs3851179; OR = 0.84;  $P = 1.1 \times 10^{-6}$ ; **Figure 2c**); (3) *RIN3* and CERAD (rs8015844; OR = 0.85;  $P = 5.3 \times 10^{-6}$ ; **Figure 2c**); (4) *PTK2B* and CAA (rs4733054; OR = 1.15;  $P = 9.9 \times 10^{-6}$ ; **Figure 2f**); (5) *TMEM106B* and gross infarcts (rs12534231; OR = 0.75,  $P = 2.4 \times 10^{-6}$ ; **Figure 2g**); (6) *GRN* and LATE-NC (rs5848; OR = 1.32;  $P = 1.3 \times 10^{-6}$ ; **Figure 2i**); (7) *APOE* and Lewy bodies (rs429358; OR = 1.23;  $P = 1.1 \times 10^{-6}$ ; **Figure 2j**); (8) *FOXF1* and hippocampal sclerosis (rs1728394; OR = 0.74  $P = 6.4 \times 10^{-6}$ ; **Figure 2k**); and (9) *MAPT* and hippocampal sclerosis (rs7210219; OR = 0.71;  $P = 4.9 \times 10^{-6}$ ; **Figure 2k**).

The other three loci, where we observed a single suggestive association each, were reported in previous phenotype association studies, including: (1) *LINC-PINT* and CERAD score (rs62471587; OR = 1.19;  $P = 4.0 \times 10^{-6}$ ; **Supplementary Table 8**; **Figure 2c**); (2) *HLA-C* and atherosclerosis (position chr6:31265340; OR = 0.53;  $P = 6.9 \times 10^{-6}$ ; **Figure 2e**); and (3) *ABCC9* and hippocampal sclerosis (rs4148674; OR = 1.30;  $P = 5.8 \times 10^{-6}$ ; **Figure 2k**). *HLA-C* (and *HLA-B*) was previously associated with atherosclerosis in the carotid arteries of patients with psoriasis<sup>7</sup>—a different cohort and tissue, but the same underlying pathology. Similarly, *LINC-PINT* was previously associated with CAA in non-*APOE*  $\epsilon 4$  carriers by Reddy et al.<sup>8</sup> while *ABCC9* was previously associated with hippocampal sclerosis in several studies<sup>9-11</sup>.

For genes meeting the suggestive threshold of  $P < 5 \times 10^{-7}$  (**Figure 2** in gold), we observed 27 suggestive associations, where three were from previously reported loci: (1) *BIN1* and CERAD score (rs6733839; OR = 1.19;  $P = 3.2 \times 10^{-7}$ ; **Supplementary Table 8**;

**Figure 2c**); (2) *PICALM* and CAA (rs57929351; OR = 1.23;  $P = 1.7 \times 10^{-7}$ ; **Figure 2f**); and (3) *CTNNA3* and hippocampal sclerosis (rs10997204; OR = 1.53;  $P = 4.7 \times 10^{-6}$ ; **Figure 2k**). *PICALM*<sup>12</sup> and *BIN1*<sup>13</sup> have long been associated with clinical AD diagnosis, while the *CTNNA3* locus was only recently associated with Lewy body dementia<sup>14</sup>. Of the other 24 (novel) suggestive loci reaching  $P < 5 \times 10^{-7}$ , twelve were associated with hippocampal sclerosis (**Figure 2k**), whereas the next highest number of suggestive associations was gross infarcts, with four. One intronic locus of *SPATA48* (formerly *C7orf72*) was close to genome-wide significance with circle of Willis atherosclerosis (rs62447817; OR = 1.35;  $P = 5.5 \times 10^{-8}$ ; **Figure 2e**), but future studies will need to assess these suggestive associations more carefully. Notably, there were zero genome-wide significant associations with gross infarcts, microinfarcts, or Lewy body pathologies. Of the four suggestive loci for gross infarct pathology, one was from a known gene in *TMEM106B* (rs12534231; OR = 0.75;  $P = 2.4 \times 10^{-6}$ ). Microinfarct pathology had a single suggestive association in *HSD17B12* (SNP located at chr11:43817807; OR = 1.74;  $P = 4.0 \times 10^{-7}$ ; **Figure 2h**). There were two suggestive associations for Lewy bodies in *HMOX1* (rs75125910; OR = 14.52,  $P = 3.5 \times 10^{-7}$ ; **Figure 2j**) and *APOE* (rs429358; OR = 1.23  $P = 1.1 \times 10^{-6}$ ).

### rs7247551 shows consistent association with CAA across *APOE* $\epsilon$ diplotypes

Forest plots for study- and *APOE*  $\epsilon$  diplotype-stratified analysis for association between rs7247551 and CAA are shown in **Extended data Figure 3**. Visual inspection of forest plots did not reveal substantial variation in effect size across diplotypes within data sources. Point estimates of OR for all diplotypes studied in NACC and ROSMAP were  $<1$ , consistent with meta-analysis, and only 95% CI for  $\epsilon 4/\epsilon 4$  in NACC and  $\epsilon 2/\epsilon 3$  in ROSMAP crossed 1. In ACT,  $\epsilon 3/\epsilon 3$  and  $\epsilon 4$  carriers had point estimates of OR  $<1$ , but the OR of the smallest group,  $\epsilon 2/\epsilon 3$ , was  $\sim 1.4$ , although it still overlapped with the estimates of  $\epsilon 3/\epsilon 3$  and  $\epsilon 4$  carriers. No interaction terms between rs7247551 and diplotype were significant in the models testing interaction effects in any of the data sources (NACC Chi-Square  $P = 0.84$ ; ROSMAP Chi-Square  $P = 0.13$ ; ACT Chi-Square  $P = 0.91$ ). These results indicate that rs7247551 shows a consistent pattern of association with CAA in each of the data sources used in our study.

## Consortium Authors and Affiliations

### Nationals Alzheimer's Coordinating Center Investigators

Walter A. Kukull<sup>1</sup>, Sarah Biber<sup>1</sup>, Marilyn Albert<sup>2</sup>, Sanjay Asthana<sup>3</sup>, David Bennett<sup>4</sup>, James Brewer<sup>5</sup>, Helena Chui<sup>6</sup>, Suzanne Craft<sup>7</sup>, Charles DeCarli<sup>8</sup>, Todd Golde<sup>9</sup>, Thomas Grabowski<sup>1</sup>, Victor Henderson<sup>10</sup>, Bradley Hyman<sup>11</sup>, Jeffrey Kaye<sup>12</sup>, Neil Kowall<sup>13</sup>, Frank LaFerla<sup>14</sup>, Allan Levey<sup>15</sup>, Oscar Lopez<sup>16</sup>, Bruce Miller<sup>17</sup>, John Morris<sup>18</sup>, Henry Paulson<sup>19</sup>, Ronald Petersen<sup>20</sup>, Eric Reiman<sup>21</sup>, Roger Rosenberg<sup>22</sup>, Mary Sano<sup>23</sup>, Andrew Saykin<sup>24</sup>, Scott Small<sup>25</sup>, Stephen Strittmatter<sup>26</sup>, Russell Swerdlow<sup>27</sup>, John Trojanowski<sup>28</sup>, Linda Van Eldik<sup>29</sup>, Robert Vassar<sup>30</sup>, Thomas Wisniewski<sup>31</sup>, Kari A. Stephens<sup>1</sup>, Kwun C. G. Chan<sup>1</sup>, Heather O'Connell<sup>1</sup>, Kathryn Gauthreaux<sup>1</sup>, Charles Mock<sup>1</sup>, Yen-Chi Chen<sup>1</sup>, Stacy Oswald<sup>1</sup>, Zack Miller<sup>1</sup>, Dean K. Shibata<sup>1</sup>, Kyle Ormsby<sup>1</sup>, Jessica Culhane<sup>1</sup>, Sarah Yasuda<sup>1</sup>

### Nationals Alzheimer's Coordinating Center Investigator Affiliations

<sup>1</sup>University of Washington, Seattle, WA, USA. <sup>2</sup>Johns Hopkins University School of Medicine, Baltimore, MD, USA. <sup>3</sup>University of Wisconsin - Madison, Madison, WI, USA. <sup>4</sup>Rush University Medical Center, Chicago, IL, USA. <sup>5</sup>University of California, San Diego, La Jolla, CA, USA. <sup>6</sup>Keck School of Medicine at University of Southern California, Los Angeles, CA, USA. <sup>7</sup>Wake Forest School of Medicine, Winston-Salem, NC, USA. <sup>8</sup>University of California, Davis School of Medicine, Sacramento, CA, USA. <sup>9</sup>Emory University School of Medicine, Atlanta, GA, USA. <sup>10</sup>Stanford University, Palo Alto, CA, USA. <sup>11</sup>Massachusetts General Hospital and Harvard Medical School, Charlestown, MA, USA. <sup>12</sup>Oregon Health & Science University, Portland, OR, USA. <sup>13</sup>Boston University Chobanian & Avedisian School of Medicine, Boston, MA, USA. <sup>14</sup>University of California, Irvine, Irvine, CA, USA. <sup>15</sup>Emory University, Atlanta, GA, USA. <sup>16</sup>University of Pittsburgh, Pittsburgh, PA, USA. <sup>17</sup>University of California San Francisco, San Francisco, CA, USA. <sup>18</sup>Washington University School of Medicine, Saint Louis, MO, USA. <sup>19</sup>University of Michigan, Ann Arbor, MI, USA. <sup>20</sup>Mayo Clinic, Rochester, MN, USA. <sup>21</sup>Banner Alzheimer's Institute, Phoenix, AZ, USA. <sup>22</sup>University of Texas Southwestern Medical Center at Dallas, Dallas, TX, USA. <sup>23</sup>Icahn School of Medicine at Mount Sinai, New York, NY, USA. <sup>24</sup>Indiana University, Indianapolis, IN, USA. <sup>25</sup>Columbia University, New York, NY, USA. <sup>26</sup>Yale University School of Medicine, New Haven, CT, USA. <sup>27</sup>University of Kansas Medical Center, Kansas City, KS, USA. <sup>28</sup>University of Pennsylvania, Philadelphia, PA, USA. <sup>29</sup>University of Kentucky, Lexington, KY, USA. <sup>30</sup>Northwestern University, Chicago, IL, USA. <sup>31</sup>New York University Grossman School of Medicine, New York, NY, USA.

### Alzheimer's Disease Genetics Consortium Investigators

James D. Bowen<sup>1</sup>, Paul K. Crane<sup>2</sup>, Gail P. Jarvik<sup>2</sup>, C. Dirk Keene<sup>2</sup>, Eric B. Larson<sup>2</sup>, Wayne C. McCormick<sup>2</sup>, Susan M. McCurry<sup>2</sup>, Shubhabrata Mukherjee<sup>2</sup>, Neil W. Kowall<sup>3</sup>, Ann C. McKee<sup>3</sup>, Robert A. J. /90/OL<sup>3</sup>, Lawrence S. Honig<sup>4</sup>, Jean Paul Vonsattel<sup>4</sup>, Jennifer Williamson<sup>4</sup>, Scott Small<sup>4</sup>, James R. Burke<sup>5</sup>, Christine M. Hulette<sup>5</sup>, Kathleen A. Welsh-Bohmer<sup>5</sup>, Marla Gearing<sup>6</sup>, James J. Lah<sup>6</sup>, Allan I. Levey<sup>6</sup>, Thomas S. Wingo<sup>6</sup>, Liana G. Apostolova<sup>7</sup>, Martin R. Farlow<sup>7</sup>, Bernardino Ghetti<sup>7</sup>, Andrew J. Saykin<sup>7</sup>, Salvatore Spina<sup>7</sup>, Marilyn S. Albert<sup>8</sup>, Constantine G. Lyketsos<sup>8</sup>, Juan C. Troncoso<sup>8</sup>, Matthew P. Frosch<sup>9</sup>, Robert C. Green<sup>10</sup>, John H. Growdon<sup>11</sup>, Bradley T. Hyman<sup>11</sup>, Rudolph E. Tanzi<sup>11</sup>, Huntington Potter<sup>12</sup>, Dennis W. Dickson<sup>13</sup>, Nilufer Ertekin-Taner<sup>13</sup>, Neill R. Graff-Radford<sup>13</sup>, Joseph E. Parisi<sup>14</sup>, Ronald C. Petersen<sup>14</sup>, Ranjan



Duara<sup>15</sup>, Joseph D. Buxbaum<sup>16</sup>, Alison M. Goate<sup>16</sup>, Mary Sano<sup>16</sup>, Arjun V. Masurkar<sup>17</sup>, Thomas Wisniewski<sup>17</sup>, Eileen H. Bigio<sup>18</sup>, Marsel Mesulam<sup>18</sup>, Sandra Weintraub<sup>18</sup>, Robert Vassar<sup>18</sup>, Jeffrey A. Kaye<sup>19</sup>, Joseph F. Quinn<sup>19</sup>, Randall L. Woltjer<sup>19</sup>, Lisa L. Barnes<sup>20</sup>, David A. Bennett<sup>20</sup>, Julie A. Schneider<sup>20</sup>, Lei Yu<sup>20</sup>, Victor Henderson<sup>21</sup>, Kenneth B. Fallon<sup>22</sup>, Lindy E. Harrell<sup>22</sup>, Daniel C. Marson<sup>22</sup>, Erik D. Roberson<sup>22</sup>, Charles DeCarli<sup>23</sup>, Lee-Way Jin<sup>23</sup>, John M. Olichney<sup>23</sup>, Ronald Kim<sup>24</sup>, Frank M. LaFerla<sup>24</sup>, Edwin Monuki<sup>24</sup>, Elizabeth Head<sup>24</sup>, David Sultzer<sup>24</sup>, Daniel H. Geschwind<sup>25</sup>, Harry V. Vinters<sup>25</sup>, Marie-Francoise Chesselet<sup>25</sup>, Douglas R. Galasko<sup>26</sup>, James B. Brewer<sup>26</sup>, Adam Boxer<sup>27</sup>, Anna Karydas<sup>27</sup>, Joel H. Kramer<sup>27</sup>, Bruce L. Miller<sup>27</sup>, Howard J. Rosen<sup>27</sup>, William W. Seeley<sup>27</sup>, Jeffrey M. Burns<sup>28</sup>, Russell H. Swerdlow<sup>28</sup>, Erin Abner<sup>29</sup>, David W. Fardo<sup>29</sup>, Linda J. Van Eldik<sup>29</sup>, Roger L. Albin<sup>30</sup>, Andrew P. Lieberman<sup>30</sup>, Henry L. Paulson<sup>30</sup>, Steven E. Arnold<sup>31</sup>, John Q. Trojanowski<sup>31</sup>, Vivianna M. Van Deerlin<sup>31</sup>, Ronald L. Hamilton<sup>32</sup>, M. Ilyas Kambh<sup>32</sup>, Oscar L. Lopez<sup>33</sup>, James T. Becker<sup>34</sup>, Chuanhai Cao<sup>35</sup>, Ashok Raj<sup>35</sup>, Amanda G. Smith<sup>35</sup>, Helena C. Chui<sup>36</sup>, Carol A. Miller<sup>36</sup>, John M. Ringman<sup>36</sup>, Lon S. Schneider<sup>36</sup>, Thomas D. Bird<sup>2</sup>, Joshua A. Sonnen<sup>2</sup>, Chang-En Yu<sup>2</sup>, Thomas Grabowski<sup>2</sup>, Elaine Peskind<sup>37</sup>, Murray Raskind<sup>37</sup>, Ge Li<sup>38</sup>, Debby W. Tsuang<sup>38</sup>, Sanjay Asthana<sup>39</sup>, Craig S. Atwood<sup>39</sup>, Cynthia M. Carlsson<sup>39</sup>, Mark A. Sager<sup>39</sup>, Nathaniel A. Chin<sup>39</sup>, Suzanne Craft<sup>40</sup>, Nigel J. Cairns<sup>41</sup>, John C. Morris<sup>41</sup>, Carlos Cruchaga<sup>42</sup>, Stephen Strittmatter<sup>43</sup>, Eric M. Reiman<sup>44</sup>, Thomas G. Beach<sup>45</sup>, Matthew J. Huentelman<sup>46</sup>, John Hardy<sup>47</sup>, Amanda J. Myers<sup>48</sup>, John S.K. Kauwe<sup>49</sup>, Hakon Hakonarson<sup>50</sup>, Deborah Blacker<sup>51</sup>, Thomas J. Montine<sup>21</sup>, Clinton T. Baldwin<sup>3</sup>, Lindsay A. Farrer<sup>3</sup>, Gyungah Jun<sup>3</sup>, Kathryn L. Lunetta<sup>3</sup>, William S. Bush<sup>52</sup>, Jonathan L. Haines<sup>52</sup>, Alan J. Lerner<sup>52</sup>, Xiongwei Zhou<sup>52</sup>, Sandra Barral<sup>4</sup>, Christiane Reitz<sup>4</sup>, Badri N. Vardarajan<sup>4</sup>, Richard Mayeux<sup>4</sup>, Gary W. Beecham<sup>48</sup>, Regina M. Carney<sup>48</sup>, Michael L. Cuccaro<sup>48</sup>, John R. Gilbert<sup>48</sup>, Kara L. Hamilton-Nelson<sup>48</sup>, Brian W. Kunkle<sup>48</sup>, Eden R. Martin<sup>48</sup>, Margaret A. Pericak-Vance<sup>48</sup>, Jeffery M. Vance<sup>48</sup>, Laura B. Cantwell<sup>31</sup>, Amanda P. Kuzma<sup>31</sup>, John Malamon<sup>31</sup>, Adam C. Naj<sup>31</sup>, Liming Qu<sup>31</sup>, Gerard D. Schellenberg<sup>31</sup>, Otto Valladares<sup>31</sup>, Li-San Wang<sup>31</sup>, Yi Zhao<sup>31</sup>, James B. Leverenz<sup>53</sup>, Philip L. De Jager<sup>54</sup>, Denis A. Evans<sup>20</sup>, Mindy J. Katz<sup>55</sup>, Richard B. Lipton<sup>55</sup>, Bradley F. Boeve<sup>14</sup>, Mariet Allen<sup>13</sup>, Minerva M. Carrasquillo<sup>13</sup>, Steven G. Younkin<sup>13</sup>, Walter A. Kukull<sup>2</sup>, Kelley M. Faber<sup>7</sup>, Tatiana M. Foroud<sup>7</sup>, Valory Pavlik<sup>56</sup>, Paul Massman<sup>56</sup>, Eveleen Darby<sup>56</sup>, Monica Rodriguear<sup>56</sup>, Aisha Khaleeq<sup>56</sup>, Donald R. Royall<sup>57</sup>, Alan Stevens<sup>58</sup>, Marcia Ory<sup>58</sup>, John C. DeToledo<sup>59</sup>, Henrick Wilms<sup>59</sup>, Kim Johnson<sup>59</sup>, Victoria Perez<sup>59</sup>, Michelle Hernandez<sup>59</sup>, Kirk C. Wilhelmsen<sup>60</sup>, Jeffrey Tilson<sup>60</sup>, Scott Chasse<sup>60</sup>, Robert C. Barber<sup>61</sup>, Thomas J. Fairchild<sup>61</sup>, Sid E. O'Bryant<sup>61</sup>, Janice Knebl<sup>61</sup>, James R. Hall<sup>61</sup>, Leigh Johnson<sup>61</sup>, Douglas Mains<sup>61</sup>, Lisa Alvarez<sup>61</sup>, Adriana Gamboa<sup>61</sup>, David Paydarfar<sup>62</sup>, John Bertelson<sup>62</sup>, Martin Woon<sup>62</sup>, Gayle Ayres<sup>62</sup>, Alyssa Aguirre<sup>62</sup>, Raymond Palmer<sup>63</sup>, Marsha Polk<sup>63</sup>, Perrie M. Adams<sup>64</sup>, Ryan M. Huebinger<sup>64</sup>, Joan S. Reisch<sup>64</sup>, Roger N. Rosenberg<sup>64</sup>, Munro Cullum<sup>64</sup>, Benjamin Williams<sup>64</sup>, Mary Quiceno<sup>64</sup>, Linda Hynan<sup>64</sup>, Janet Smith<sup>64</sup>, Barb Davis<sup>64</sup>, Trung Nguyen<sup>64</sup>, Ekaterina Rogaeva<sup>65</sup>, Peter St George-Hyslop<sup>65</sup>

## Alzheimer's Disease Genetics Consortium Investigator Affiliations

<sup>1</sup>Swedish Medical Center, Seattle, Washington, USA. <sup>2</sup>University of Washington, Seattle, Washington, USA. <sup>3</sup>Boston University, Boston, Massachusetts, USA. <sup>4</sup>Columbia University, New York, New York, USA. <sup>5</sup>Duke University, Durham, North Carolina, USA. <sup>6</sup>Emory University, Atlanta, Georgia, USA. <sup>7</sup>Indiana University, Indianapolis, Indiana, USA. <sup>8</sup>Johns

Hopkins University, Baltimore, Maryland, USA. <sup>9</sup>Massachusetts General Hospital, Boston, Massachusetts, USA. <sup>10</sup>Massachusetts General Hospital/Brigham and Women's Hospital and Harvard Medical School, Boston, Massachusetts, USA. <sup>11</sup>Massachusetts General Hospital/Harvard Medical School, Boston, Massachusetts, USA. <sup>12</sup>Massachusetts General Hospital/University of Colorado School of Medicine, Boston, Massachusetts, USA. <sup>13</sup>Mayo Clinic, Jacksonville, Florida, USA. <sup>14</sup>Mayo Clinic, Rochester, Minnesota, USA. <sup>15</sup>Mount Sinai Medical Center, Miami Beach, Florida, USA. <sup>16</sup>Mount Sinai School of Medicine, New York, New York, USA. <sup>17</sup>New York University, New York, New York, USA. <sup>18</sup>Northwestern University Feinberg School of Medicine, Chicago, Illinois, USA. <sup>19</sup>Oregon Health & Science University, Portland, Oregon, USA. <sup>20</sup>Rush University Medical Center, Chicago, Illinois, USA. <sup>21</sup>Stanford University, Stanford, California, USA. <sup>22</sup>University of Alabama at Birmingham, Birmingham, Alabama, USA. <sup>23</sup>University of California Davis, Sacramento, California, USA. <sup>24</sup>University of California Irvine, Irvine, California, USA. <sup>25</sup>University of California Los Angeles, Los Angeles, California, USA. <sup>26</sup>University of California San Diego, San Diego, California, USA. <sup>27</sup>University of California San Francisco, San Francisco, California, USA. <sup>28</sup>University of Kansas Medical Center, Kansas City, Kansas, USA. <sup>29</sup>University of Kentucky, Lexington, Kentucky, USA. <sup>30</sup>University of Michigan, Ann Arbor, Michigan, USA. <sup>31</sup>University of Pennsylvania Perelman School of Medicine, Philadelphia, Pennsylvania, USA. <sup>32</sup>University of Pittsburgh, Pittsburgh, Pennsylvania, USA. <sup>33</sup>University of Pittsburgh Alzheimer's Disease Research Center, Pittsburgh, Pennsylvania, USA. <sup>34</sup>University of Pittsburgh School of Medicine, Pittsburgh, Pennsylvania, USA. <sup>35</sup>University of South Florida, Tampa, Florida, USA. <sup>36</sup>University of Southern California, Los Angeles, California, USA. <sup>37</sup>University of Washington School of Medicine, Seattle, Washington, USA. <sup>38</sup>University of Washington/VA Puget Sound Health Care System/GRECC, Seattle, Washington, USA. <sup>39</sup>University of Wisconsin, Madison, Wisconsin, USA. <sup>40</sup>Wake Forest University, Winston-Salem, North Carolina, USA. <sup>41</sup>Washington University, St. Louis, Missouri, USA. <sup>42</sup>Washington University School of Medicine, St. Louis, Missouri, USA. <sup>43</sup>Yale University, New Haven, Connecticut, USA. <sup>44</sup>Banner Health/Translational Genomics Research Institute, Phoenix, Arizona, USA. <sup>45</sup>Banner Sun Health Research Institute, Phoenix, Arizona, USA. <sup>46</sup>Translational Genomics Research Institute, Phoenix, Arizona, USA. <sup>47</sup>University College London, Queens Square, London, UK. <sup>48</sup>University of Miami, Miami, Florida, USA. <sup>49</sup>Brigham Young University, Provo, Utah, USA. <sup>50</sup>Children's Hospital of Philadelphia, Philadelphia, Pennsylvania, USA. <sup>51</sup>Harvard School of Public Health, Boston, Massachusetts, USA. <sup>52</sup>Case Western Reserve University, Cleveland, Ohio, USA. <sup>53</sup>Cleveland Clinic, Cleveland, Ohio, USA. <sup>54</sup>Brigham and Women's Hospital and Harvard Medical School, Boston, Massachusetts, USA. <sup>55</sup>Albert Einstein College of Medicine, New York, New York, USA. <sup>56</sup>Baylor College of Medicine, Houston, Texas, USA. <sup>57</sup>South Texas Veterans Health Administration Geriatric Research Education & Clinical Center (GRECC), UT Health Science Center at San Antonio, San Antonio, Texas, USA. <sup>58</sup>Texas A&M University Health Science Center, Lubbock, Texas, USA. <sup>59</sup>Texas Tech University Health Science Center, Lubbock, Texas, USA. <sup>60</sup>University of North Carolina, Chapel Hill, North Carolina, USA. <sup>61</sup>University of North Texas Health Science Center, Fort Worth, Texas, USA. <sup>62</sup>University of Texas at Austin/Dell Medical School, Austin, Texas, USA. <sup>63</sup>University of Texas Health Science Center - San Antonio, Houston, Texas, USA. <sup>64</sup>University of Texas Southwestern Medical Center, Dallas, Texas, USA. <sup>65</sup>University of Toronto, Toronto, Ontario, Canada

## Alzheimer's Disease Genetics Consortium Full Acknowledgments

The National Institutes of Health, National Institute on Aging (NIH-NIA) supported this work through the following grants: ADGC, U01 AG032984, RC2 AG036528; Samples from the National Cell Repository for Alzheimer's Disease (NCRAD), which receives government support under a cooperative agreement grant (U24 AG21886) awarded by the National Institute on Aging (NIA), were used in this study. We thank contributors who collected samples used in this study, as well as patients and their families, whose help and participation made this work possible; Data for this study were prepared, archived, and distributed by the National Institute on Aging Alzheimer's Disease Data Storage Site (NIAGADS) at the University of Pennsylvania (U24-AG041689); GCAD, U54 AG052427; NACC, U01 AG016976; NIA LOAD (Columbia University), U24 AG026395, U24 AG026390, R01AG041797; Banner Sun Health Research Institute P30 AG019610; Boston University, P30 AG013846, U01 AG10483, R01 CA129769, R01 MH080295, R01 AG017173, R01 AG025259, R01 AG048927, R01AG33193, R01 AG009029; Columbia University, P50 AG008702, R37 AG015473, R01 AG037212, R01 AG028786; Duke University, P30 AG028377, AG05128; Emory University, AG025688; Group Health Research Institute, U01 AG006781, U01 HG004610, U01 HG006375, U01 HG008657; Indiana University, P30 AG10133, R01 AG009956, RC2 AG036650; Johns Hopkins University, P50 AG005146, R01 AG020688; Massachusetts General Hospital, P50 AG005134; Mayo Clinic, P50 AG016574, R01 AG032990, KL2 RR024151; Mount Sinai School of Medicine, P50 AG005138, P01 AG002219; New York University, P30 AG08051, UL1 RR029893, 5R01AG012101, 5R01AG022374, 5R01AG013616, 1RC2AG036502, 1R01AG035137; North Carolina A&T University, P20 MD000546, R01 AG28786-01A1; Northwestern University, P30 AG013854; Oregon Health & Science University, P30 AG008017, R01 AG026916; Rush University, P30 AG010161, R01 AG019085, R01 AG15819, R01 AG17917, R01 AG030146, R01 AG01101, RC2 AG036650, R01 AG22018; TGen, R01 NS059873; READI study is supported by NIA grant AG052410; University of Alabama at Birmingham, P50 AG016582; University of Arizona, R01 AG031581; University of California, Davis, P30 AG010129; University of California, Irvine, P50 AG016573; University of California, Los Angeles, P50 AG016570; University of California, San Diego, P50 AG005131; University of California, San Francisco, P50 AG023501, P01 AG019724; University of Kentucky, P30 AG028383, AG05144; University of Michigan, P50 AG008671; University of Pennsylvania, P30 AG010124; University of Pittsburgh, P50 AG005133, AG030653, AG041718, AG07562, AG02365; University of Southern California, P50 AG005142; University of Texas Southwestern, P30 AG012300; University of Miami, R01 AG027944, AG010491, AG027944, AG021547, AG019757; University of Washington, P50 AG005136, R01 AG042437; University of Wisconsin, P50 AG033514; Vanderbilt University, R01 AG019085; and Washington University, P50 AG005681, P01 AG03991, P01 AG026276. The Kathleen Price Bryan Brain Bank at Duke University Medical Center is funded by NINDS grant # NS39764, NIMH MH60451 and by Glaxo Smith Kline. Support was also from the Alzheimer's Association (LAF, IIRG-08-89720; MP-V, IIRG-05-14147), the US Department of Veterans Affairs Administration, Office of Research and Development, Biomedical Laboratory Research Program, and BrightFocus Foundation (MP-V, A2111048). P.S.G.-H. is supported by Wellcome Trust, Howard Hughes Medical Institute, and the Canadian Institute of Health Research. Genotyping of the TGEN2 cohort was supported by Kronos Science. The TGen

series was also funded by NIA grant AG041232 to AJM and MJH, The Banner Alzheimer's Foundation, The Johnnie B. Byrd Sr. Alzheimer's Institute, the Medical Research Council, and the state of Arizona and also includes samples from the following sites: Newcastle Brain Tissue Resource (funding via the Medical Research Council, local NHS trusts and Newcastle University), MRC London Brain Bank for Neurodegenerative Diseases (funding via the Medical Research Council), South West Dementia Brain Bank (funding via numerous sources including the Higher Education Funding Council for England (HEFCE), Alzheimer's Research Trust (ART), BRACE as well as North Bristol NHS Trust Research and Innovation Department and DeNDRoN), The Netherlands Brain Bank (funding via numerous sources including Stichting MS Research, Brain Net Europe, Hersenstichting Nederland Breinbrekend Werk, International Parkinson Fonds, Internationale Stichting Alzheimer Onderzoek), Institut de Neuropatologia, Servei Anatomia Patologica, Universitat de Barcelona. ADNI data collection and sharing was funded by the National Institutes of Health Grant U01 AG024904 and Department of Defense award number W81XWH-12-2-0012. ADNI is funded by the National Institute on Aging, the National Institute of Biomedical Imaging and Bioengineering, and through generous contributions from the following: AbbVie, Alzheimer's Association; Alzheimer's Drug Discovery Foundation; Araclon Biotech; BioClinica, Inc.; Biogen; Bristol-Myers Squibb Company; CereSpir, Inc.; Eisai Inc.; Elan Pharmaceuticals, Inc.; Eli Lilly and Company; EuroImmun; F. Hoffmann-La Roche Ltd and its affiliated company Genentech, Inc.; Fujirebio; GE Healthcare; IXICO Ltd.; Janssen Alzheimer Immunotherapy Research & Development, LLC.; Johnson & Johnson Pharmaceutical Research & Development LLC.; Lumosity; Lundbeck; Merck & Co., Inc.; Meso Scale Diagnostics, LLC.; NeuroRx Research; Neurotrack Technologies; Novartis Pharmaceuticals Corporation; Pfizer Inc.; Piramal Imaging; Servier; Takeda Pharmaceutical Company; and Transition Therapeutics. The Canadian Institutes of Health Research is providing funds to support ADNI clinical sites in Canada. Private sector contributions are facilitated by the Foundation for the National Institutes of Health ([www.fnih.org](http://www.fnih.org)). The grantee organization is the Northern California Institute for Research and Education, and the study is coordinated by the Alzheimer's Disease Cooperative Study at the University of California, San Diego. ADNI data are disseminated by the Laboratory for Neuro Imaging at the University of Southern California.

## Supplement References

1. Shade, L. M. et al. Genome-wide association study of brain arteriolosclerosis. *J. Cereb. Blood Flow Metab.* **42**, 1437-1450 (2022).
2. Manichaikul, A. et al. Robust relationship inference in genome-wide association studies. *Bioinformatics* **26**, 2867-2873 (2010).
3. Abecasis, G. R. et al. An integrated map of genetic variation from 1,092 human genomes. *Nature* **491**, 56-65 (2012).
4. Braak, H. & Braak, E. Neuropathological staging of Alzheimer-related changes. *Acta Neuropathol.* **82**, 239-259 (1991).
5. Nelson, P. T. et al. Limbic-predominant age-related TDP-43 encephalopathy (LATE): consensus working group report. *Brain* **142**, 1503-1527 (2019).

6. Bellenguez, C. et al. New insights into the genetic etiology of Alzheimer's disease and related dementias. *Nat. Genet.* **54**, 412-436 (2022).
7. Eder, L. et al. The Association of HLA-class I Genes and the Extent of Atherosclerotic Plaques in Patients with Psoriatic Disease. *J. Rheumatol.* **43**, 1844-1851 (2016).
8. Reddy, J. S. et al. Genome-wide analysis identifies a novel LINC-PINT splice variant associated with vascular amyloid pathology in Alzheimer's disease. *Acta Neuropathol. Commun.* **9**, 93 (2021).
9. Katsumata, Y. et al. LATE-NC risk alleles (in TMEM106B, GRN, and ABCC9 genes) among persons with African ancestry. *J. Neuropathol. Exp. Neurol.* **82**, 760-768 (2023).
10. Dugan, A. J. et al. Analysis of genes (TMEM106B, GRN, ABCC9, KCNMB2, and APOE) implicated in risk for LATE-NC and hippocampal sclerosis provides pathogenetic insights: a retrospective genetic association study. *Acta Neuropathol. Commun.* **9**, 152 (2021).
11. Nelson, P. T. et al. ABCC9 gene polymorphism is associated with hippocampal sclerosis of aging pathology. *Acta Neuropathol.* **127**, 825-843 (2014).
12. Harold, D. et al. Genome-wide association study identifies variants at CLU and PICALM associated with Alzheimer's disease. *Nat. Genet.* **41**, 1088-1093 (2009).
13. Seshadri, S. et al. Genome-wide analysis of genetic loci associated with Alzheimer disease. *JAMA* **303**, 1832-1840 (2010).
14. Gibbons, E. et al. Identification of a sex-specific genetic signature in dementia with Lewy bodies: a meta-analysis of genome-wide association studies. *medRxiv*, 2022.2011.2022.22282597 (2022).
15. Pruim, R. J. et al. LocusZoom: regional visualization of genome-wide association scan results. *Bioinformatics* **26**, 2336-2337 (2010).
